# Supplementary material for: Structural stability and stabilization of Li2MoO3
Source: Royal Society of Chemistry journal article supplement (doi:10.1039/c7cp03594b), 2017-01-01
Supplement: c7cp03594b1.pdf [file c7cp03594b1.pdf]

## Supporting Information

### Structural Stability and Stabilization of $\text{Li}_2\text{MoO}_3$

Meng Tian<sup>a, b</sup>, Yurui Gao<sup>c</sup>, Ruijuan Xiao<sup>a, b</sup>, Zhaoxiang Wang<sup>a, b</sup>\*, Liquan Chen<sup>a, b</sup>

<sup>a</sup> Key Laboratory for Renewable Energy, Beijing Key Laboratory for New Energy Materials and Devices, National Laboratory for Condensed Matter Physics, Institute of Physics, Chinese Academy of Sciences, Beijing 100190, China

<sup>b</sup> School of Physical Sciences, University of Chinese Academy of Sciences, Beijing 100049, China

<sup>c</sup> Department of Physics and Astronomy, California State University Northridge, Northridge, California 91330-8268, USA

\*E-mail: zxwang@iphy.ac.cn

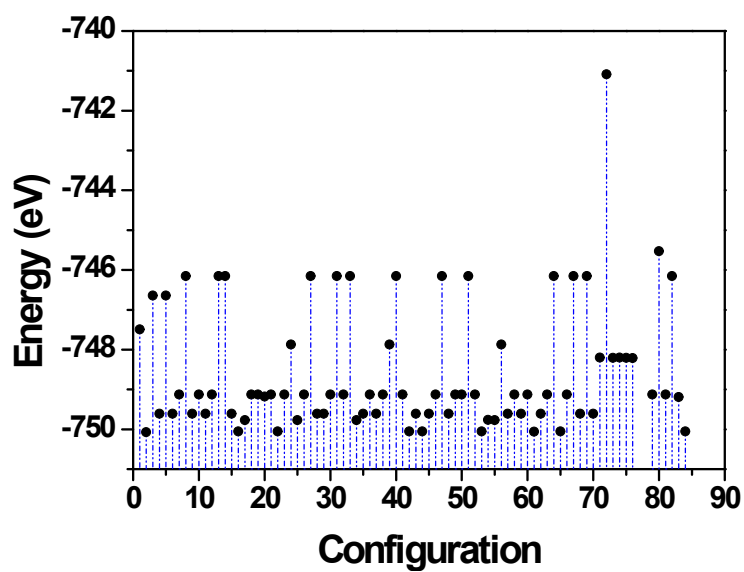

Fig. S1 Total energies of different configurations.

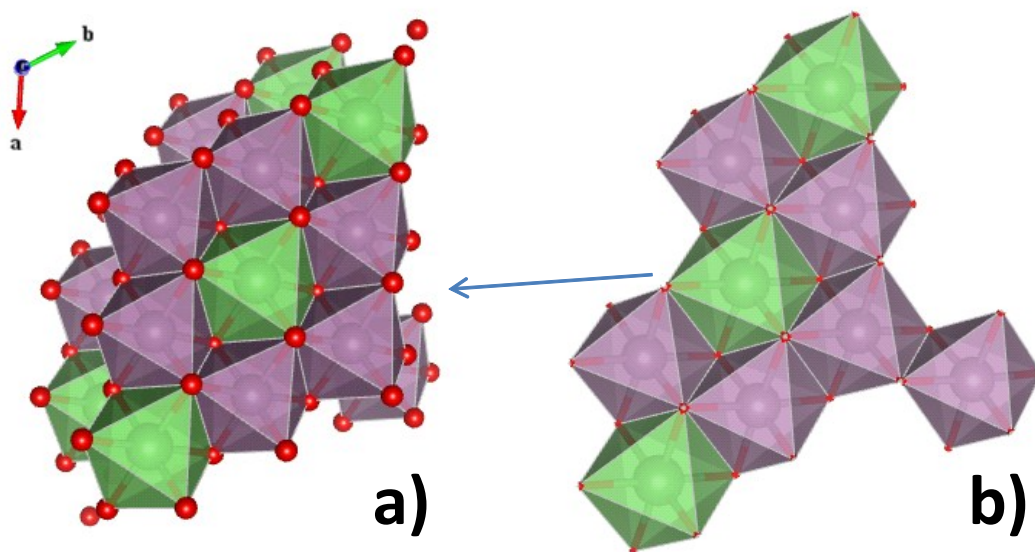

Fig. S2 The schematic diagram of the  $\text{LiMo}_2$  of  $\text{Li}_2\text{MoO}_3$  in a top view a) all the three  $\text{LiMo}_2$  layer, b) the second  $\text{LiMo}_2$  layer with some displacement of Mo-ion.

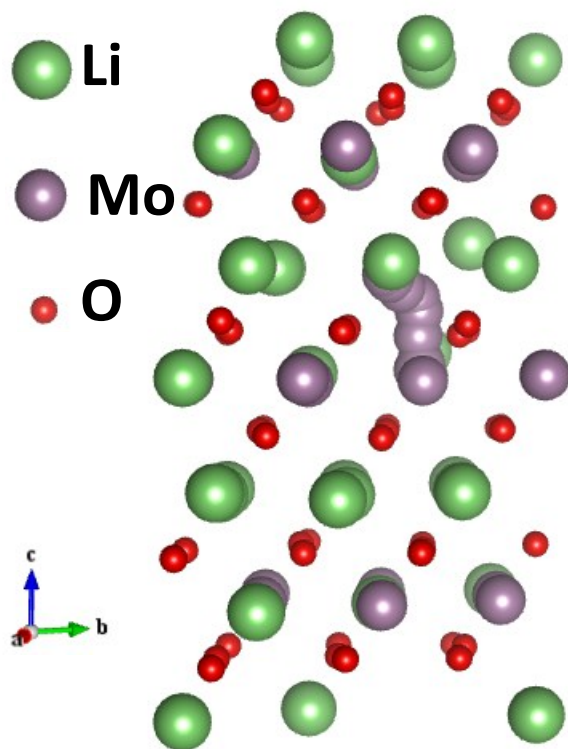

Fig. S3 The migration pathway of the Mo-ion associated to Fig. 2a.

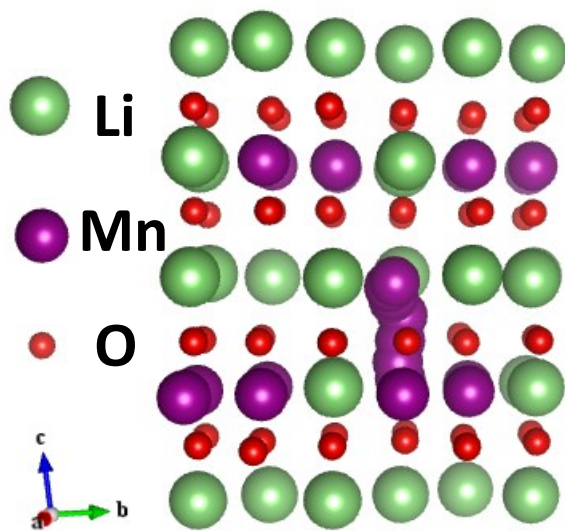

Fig. S4 The migration pathway of the Mn-ion associated to Fig. 2b.

Table S1 The distortion of  $\text{MoO}_6$  octahedron before and after Li-vacancy conducted.

| Six MoO <sub>6</sub> octahedra | Distortion index (before) | Distortion index (after) |
|--------------------------------|---------------------------|--------------------------|
| Mo1                            | 0.00805                   | 0.06861                  |
| Mo2                            | 0.00393                   | 0.04342                  |
| Mo3                            | 0.00393                   | 0.03784                  |
| Mo4                            | 0.00805                   | 0.05976                  |
| Mo5                            | 0.00805                   | 0.03365                  |
| Mo6                            | 0.00393                   | 0.06283                  |

**Table S2 The calculated length of the M-O bonds in Li<sub>2</sub>MoO<sub>3</sub>.**

| octahedron       | bond    | d(Å)   | octahedron       | Bond    | d(Å)   | octahedron       | bond    | d(Å)   |
|------------------|---------|--------|------------------|---------|--------|------------------|---------|--------|
| MoO <sub>6</sub> | Mo6-O23 | 2.0938 | TcO <sub>6</sub> | Tc1-O23 | 2.0570 | NbO <sub>6</sub> | Nb1-O23 | 2.0455 |
|                  | Mo6-O24 | 2.0674 |                  | Tc1-O24 | 2.0561 |                  | Nb1-O24 | 2.0480 |
|                  | Mo6-O27 | 2.0782 |                  | Tc1-O27 | 2.0557 |                  | Nb1-O27 | 2.0220 |
|                  | Mo6-O50 | 2.0938 |                  | Tc1-O50 | 2.0570 |                  | Nb1-O50 | 2.0455 |
|                  | Mo6-O53 | 2.0674 |                  | Tc1-O53 | 2.0561 |                  | Nb1-O53 | 2.0480 |
|                  | Mo6-O54 | 2.0782 |                  | Tc1-O54 | 2.0557 |                  | Nb1-O54 | 2.0220 |
| SbO <sub>6</sub> | Sb1-O23 | 2.0350 | PdO <sub>6</sub> | Pd1-O23 | 2.1763 | RuO <sub>6</sub> | Ru1-O23 | 2.0605 |
|                  | Sb1-O24 | 2.0385 |                  | Pd1-O24 | 2.1752 |                  | Ru1-O24 | 2.1451 |
|                  | Sb1-O27 | 2.0253 |                  | Pd1-O27 | 2.1803 |                  | Ru1-O27 | 2.0961 |
|                  | Sb1-O50 | 2.0350 |                  | Pd1-O50 | 2.1763 |                  | Ru1-O50 | 2.0605 |
|                  | Sb1-O53 | 2.0385 |                  | Pd1-O53 | 2.1752 |                  | Ru1-O53 | 2.1451 |
|                  | Sb1-O54 | 2.0253 |                  | Pd1-O54 | 2.1803 |                  | Ru1-O54 | 2.0961 |
| SnO <sub>6</sub> | Sn1-O23 | 2.0471 | TiO <sub>6</sub> | Ti1-O23 | 1.9893 |                  |         |        |
|                  | Sn1-O24 | 2.0574 |                  | Ti1-O24 | 2.0188 |                  |         |        |
|                  | Sn1-O27 | 2.0515 |                  | Ti1-O27 | 2.0118 |                  |         |        |
|                  | Sn1-O50 | 2.0471 |                  | Ti1-O50 | 1.9893 |                  |         |        |
|                  | Sn1-O53 | 2.0574 |                  | Ti1-O53 | 2.0188 |                  |         |        |
|                  | Sn1-O54 | 2.0515 |                  | Ti1-O54 | 2.0118 |                  |         |        |

**Table S3 The length of Mo-O bond before and after transition metal doped.**

| Configurations          | Origin  | Tc_doped | Nb_doped | Sb_doped | Pd_doped | Ru_doped | Sn_doped | Ti_doped |
|-------------------------|---------|----------|----------|----------|----------|----------|----------|----------|
| Average bond length (Å) | 2.0824  | 2.0812   | 2.0874   | 2.0841   | 2.0815   | 2.0859   | 2.0813   | 2.0818   |
| Mo5-O49 (Å)             | 2.07086 | 2.07907  | 2.05091  | 2.05188  | 2.08674  | 2.08900  | 2.07196  | 2.08302  |
| Mo5-O22 (Å)             | 2.07086 | 2.05870  | 2.05782  | 2.05206  | 2.05644  | 2.07924  | 2.06924  | 2.06850  |
| Mo5-O23 (Å)             | 2.10757 | 2.13105  | 2.16786  | 2.15765  | 2.13256  | 2.12193  | 2.13704  | 2.12702  |
| Mo5-O52 (Å)             | 2.10757 | 2.13283  | 2.12079  | 2.11251  | 2.13129  | 2.15897  | 2.13046  | 2.14208  |
| Mo5-O26 (Å)             | 2.06889 | 2.04070  | 2.05126  | 2.05032  | 2.04186  | 2.04189  | 2.03872  | 2.03436  |
| Mo5-O53 (Å)             | 2.06889 | 2.04480  | 2.07565  | 2.07988  | 2.04034  | 2.02465  | 2.04055  | 2.03573  |
